# Supplementary material for: Sarcopenia for predicting mortality among elderly nursing home residents: SARC-F versus SARC-CalF
Source: PubMed Central journal article supplement — Medicine (Baltimore). 2019 Feb 15;98(7):e14546. doi: 10.1097/MD.0000000000014546 (PMC6407983; doi:10.1097/md.0000000000014546), 2019-02-15
Supplement: medi-98-e14546-s001.pdf [file medi-98-e14546-s001.pdf]

## Title page

### Title:

Sarcopenia for predicting mortality among elderly nursing home residents: SARC-F versus SARC-CalF

### Author list and affiliations:

Ming Yang MD <sup>1,2</sup>; Jiaojiao Jiang MD <sup>3</sup>; Yanli Zeng PhD<sup>4,5</sup>; Huairong Tang MSN<sup>6</sup>

1. The Center of Gerontology and Geriatrics, West China Hospital, Sichuan University, No. 37 Guoxue Lane, Chengdu, Sichuan, China.
2. Precision Medicine Research Center, West China Hospital, Sichuan University, No. 37 Guoxue Lane, Chengdu, Sichuan, China.
3. The Center of Rehabilitation, West China Hospital, Sichuan University, No. 37 Guoxue Lane, Chengdu, Sichuan, China.
4. Institute for Disaster Management and Reconstruction, Sichuan University, Chengdu, Sichuan, China.
5. School of Nursing, Chengdu University of Traditional Chinese Medicine, Chengdu, Sichuan, China.
6. Health Management Center, West China Hospital, Sichuan University, No. 37 Guoxue Lane, Chengdu, Sichuan, China.

### Information of the corresponding author:

Huairong Tang, Health Management Center, West China Hospital, Sichuan University, No. 37 Guoxue

Lane, Chengdu, China. Phone: +86 28 8542 2131. Fax: +86 28 8542 2131. Email: [1651682099@qq.com](mailto:1651682099@qq.com)

**Supplementary Table 1. The SARC-CalF and SARC-F scales. Adapted from Barbosa-Silva et al. <sup>1</sup> and Malmstrom et al. <sup>2</sup>**

| Components            | Questions                                                          | SARC-F<br>Score                                       | SARC-CalF<br>Score                                                      |
|-----------------------|--------------------------------------------------------------------|-------------------------------------------------------|-------------------------------------------------------------------------|
| Strength              | How much difficulty do you have in lifting and carrying 10 pounds? | None=0<br>Some =1<br>A lot or unable = 2              | None=0<br>Some =1<br>A lot or unable = 2                                |
| Assistance in walking | How much difficulty do you have walking across a room?             | None=0<br>Some =1<br>A lot, use aids, or unable = 2   | None=0<br>Some =1<br>A lot, use aids, or unable = 2                     |
| Rise from a chair     | How much difficulty do you have transferring from a chair or bed?  | None=0<br>Some =1<br>A lot or unable without help = 2 | None=0<br>Some =1<br>A lot or unable without help = 2                   |
| Climb stairs          | How much difficulty do you have climbing a flight of 10 stairs?    | None=0<br>Some =1<br>A lot or unable = 2              | None=0<br>Some =1<br>A lot or unable = 2                                |
| Falls                 | How many times have you fallen in the past year?                   | None=0<br>1-3 falls =1<br>4 or more falls = 2         | None=0<br>1-3 falls =1<br>4 or more falls = 2                           |
| Calf circumference    |                                                                    | -                                                     | Women:<br>>33 cm = 0<br>≤33 cm =10<br>Men:<br>>34 cm = 0<br>≤34 cm = 10 |

**References**

1. Barbosa-Silva TG, Menezes AM, Bielemann RM, et al. Enhancing SARC-F: Improving Sarcopenia Screening in the Clinical Practice. J Am Med Dir Assoc 2016;17(12):1136-41.
2. Malmstrom TK, Morley JE. SARC-F: a simple questionnaire to rapidly diagnose sarcopenia. J Am Med Dir Assoc 2013;14(8):531-2.
